# Supplementary material for: Identification and Characterization of Novel Fusion Genes with Potential Clinical Applications in Mexican Children with Acute Lymphoblastic Leukemia
Source: MDPI journal article supplement (doi:10.3390/ijms20102394), 2019-05-15
Supplement: s1 [file s1]

ETV6-NUFIP1 fusion gene

| ETV611803093                                             | NUFIP145540070                                            |
|----------------------------------------------------------|-----------------------------------------------------------|
| CTCTCTCGCTGTGAGACATGTCTGAGACTCCTGCTCAGTGTAGCATTAAG       | AAACTATCCAACCTCTGGCCAATATTGAAAGGAAGAAGAAGTTAAAACTTG       |
| CCTGATCTCTCTCGCTGTGAGACATGTCTGAGACTCCTGCTCAGTGTAGCATT    |                                                           |
| CCTGATCTCTCTCGCTGTGAGACATGTCTGAGACTCCTGCTCAGTGTAGCATTAAG | AAACTATCC                                                 |
| CCTGATCTCTCTCGCTGTGAGACATGTCTGAGACTCCTGCTCAGTGTAGCATTAAG | AAACTATCCAACCTCTGG                                        |
| TGATCTCTCTCGCTGTGAGACATGTCTGAGACTCCTGCTCAGTGTAGCATTAAG   | AAACTATCCAACCTCTGGCC                                      |
| TGATCTCTCTCGCTGTGAGACATGTCTGAGACTCCTGCTCAGTGTAGCATTAAG   | AAACTATCCAACCTCTGGCC                                      |
| ATCTCTCTCGCTGTGAGACATGTCTGAGACTCCTGCTCAGTGTAGCATTAAG     | AAACTATCCACCTCTGGCCAAT                                    |
| TCTCTCTCGCTGTGAGACATGTCTGAGACTCCTGCTCAGTGTAGCATTAAG      | AAACTATCCAACCTCTGGCCAAT                                   |
| CGCTGTGAGACATGTCTGAGACTCCTGCTCAGTGTAGCATTAAG             | AAACTATCCAACCTCTGG                                        |
| CGCTGTGAGACATGTCTGAGACTCCTGCTCAGTGTAGCATTAAG             | AAACTATCCAACCTCTGGCC                                      |
| CTGTGAGACATGTCTGAGACTCCTGCTCAGTGTAGCATTAAG               | AAACTATCCAACCTCTGGCCAATATTGAAAGG                          |
| GTGAGACATGTCTGAGACTCCTGCTCAGTGTAGCATTAAG                 | AAACTATCCAACCTCTGGCCAATATTGAAAGGA                         |
| GACATGTCTGAGACTCCTGCTCAGTGTAGCATTAAG                     | AAACTATCCAACCTCTGGCCAATATTGAAAGGA                         |
| CCTGCTCAGTGTAGCATTAAG                                    | AAACTATCCAACCTCTGGCCAATATTGAAAGGAAGAAGAAGTTAAAACTTGA      |
| GTAGCATTAAG                                              | AAACTATACAACTCTGGCCAATATTGAAAGGAAGAAGAAGTTAAAACTTGAAAAGG  |
| GTAGCATTAAG                                              | AAACTATCCAACCTCTGGCCAATATTGAAAGGAAGAAGAAGTTAAAACTTGAAAAGG |
| GTAGCATTAAG                                              | AAACTATCCAACCTCTGGCCAATATTGAAAGGAAGAAGAAGTTAAAACTTGAAAAGG |
| AGCATTAAG                                                | AAACTATCCAACCTCTGGCCAATATTGAAAGGAAGAAGAAGTTAAAACTTGAAAAGG |
| AGCATTAAG                                                | AAACTATCCAACCTCTGGCCAATATTGAAAGGAAGAAGAAGTTAAAACTTGAAAAGG |
| GCATTAAG                                                 | AAACTATCCAACCTCTGGCCAATATTGAAAGGAAGAAGAAGTTAAAACTTGAAAAGG |
|                                                          | AACTATCCAACCTCTGGCCAATATTGAAAGGAAGAAGAAGTTAAAACTTGAAAAGG  |
|                                                          | ATCCAACCTCTGGCCAATATTGAAAGGAAGAAGAAGTTAAAACTTGAAAAGG      |
|                                                          | CAACTCTGGCCAATATTGAAAGGAAGAAGAAGTTAAAACTTGAAAAGG          |
