# Supplementary material for: Identification and Characterization of Novel Fusion Genes with Potential Clinical Applications in Mexican Children with Acute Lymphoblastic Leukemia
Source: MDPI journal article supplement (doi:10.3390/ijms20102394), 2019-05-15
Supplement: s1 [file s1]

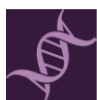

## Supplementary Figures

### *CREBBP-SRGAP2B fusion gene*

```
CREBBP 3929832 SRGAP2B 144013900
CAAAGAGCCAACTCAGCTCGCCCGTTTCTCGGCGAATGACAGCACAG AGATCCGTGCTCAGCTCACAGAGCAGATGAAATGCCTGGACCAGCAGTG
:AACCCCAAAAGAGCCAACTCAGCTCGCCCGTTTCTCGGCGAATGACAGCAC
:AACCCCAAAAGAGCCAACTCAGCTCGCCCGTTTCTCGGCGAATGACAGCACAG AGATCCGT
:AACCCCAAAAGAGCCAACTCAGCTCGCCCGTTTCTCGGCGAATGACAGCACAG AGATCCGT
:AACCCCAAAAGAGCCAACTCAGCTCGCCCG
:AACCCCAAAAGAGCCAACTCAGCTCGCCCGTTTCTCGGCGAATGACAGCACAG AGATCCGTGC
:AACCCCAAAAGAGCCAACTCAGCTCGCCCGTTTCTCGGCGAATGACAGCACAG AGTCCGTGCTCAGCTC
CCAAAGAGCCAACTCAGCTCGCCCGTTTCTCGGCGAATGACAGCAC AGTCCGTGCTCAGCTC
AAGAGCCAACTCAGCTCGCCCGTTTCTCGGCGAATGACAGCACAG AGTCCGTGCTCAGCTC
AGAGCCAACTCAGCTCGCCCGTTTCTCGGCGAATGACAGCACAG AGATCCGTGCTCAGCTCAC
CAAAGAGCCAACTCAGCTCGCCCGTTTCTCGGCGAATGACAGCACAG AGATCCGTGCTCAGCTCACAGAGCAGATGAAAT
AAAGAGCCAACTCAGCTCGCCCGTTTCTCGGCGAATGACAGCACAG AGATCCGTGCTCAGCTCACAGAGCAGATGAAATG
AACTCAGCTCGCCCGTTTCTCGGCGAATGACAGCACAG AGATCCGTGCTCAGCTCACAGAGCAGATGAAATG
CAGCTCGCCCGTTTCTCGGCGAATGACAGCACAG AGATCCGTGCTCAGCTCACAGAGCAGATGAAATGCCTG
CAGCTCGCCCGTTTCTCGGCGAATGACAGCACAG AGATCCGTGCTCAGCTCACAGAGCAGATGAAATGCCTG
CGTTTCTCGGCGAATGACAGCACAG AGATCCGTGCTCAGCTCACAGAGCAGATGAAATGCCTGGACCAGC
GTTTTCTCGGCGAATGACAGCACAG AGATCCGTGCTCAGCTCACAGAGCAGATGAAATGCCTGGACCAGCAGTG
GTTTTCTCGGCGAATGACAGCACAG AGATCCGTGCTCAGCTCACAGAGCAGATGAAATGCCTGGACCAGCAGTG
TTCTCGGCGAATGACAGCACAG AGATCCGTGCTCAGCTCACAGAGCAGATG
CGGCGAATGACAGCACAG AGATCCGTGCTCAGCTCACAGAGCAGATGAAATGCCTGGACCAGCAGTGAG
CGGCGAATGACAGCACAG AGATCCGTGCTCAGCTCACAGAGCAGATGAAATGCCTGGACCAGCAGTGAGCTT
CGGCGAATGACAGCACAG AGATCCGTGCTCAGCTCACAGAGCAGATGAAATGCCTGGACCAGCAGTGAGCTT
GCGAATGACAGCACAG AGATCCGTGCTCAGCTCACAGAGCAGATGAAATGCCTGGACCAGCAGTGAGCTT
CAGCACAG AGATCCGTGCTCAGCTCACAGAGCAGATGAAATGCCTGGACCAGCAGTGAGCTT
CACAG AGATCCGTGCTCAGCTCACAGAGCAGATGAAATGCCTGGACCAGCAGTGAGCTT
CAGAGATCCGTGCTCAGCTCACAGAGCAGATGAAATGCCTGGACCAGCAGTGAGCTT
AGATCCGTGCTCAGCTCACAGAGCAGATGAAATGCCTGGACCAGCAGTGAGCTT
```

**Supplementary Figure 1. CREBBP-SRGAP2B fusion transcript.** Alignment of sequence reads mapping across the CREBBP-SRGAP2B fusion gene. The nucleotide position and sequence of the assembled fusion transcript appears at the top and reads are showing below it and the vertical line indicates the fusion point. The data were obtained from RNA-seq analysis of the 74MO case transcriptome using the TopHat-Fusion.

**DNAH14-IKZF1 fusion gene**

| DNAH14 225333860                                                         | IKZF1 50444490                                               |
|--------------------------------------------------------------------------|--------------------------------------------------------------|
| AAACCACTAGTGGGCGCTATGAGGCTCCACATGAGTGAGGCCAAAAAGC                        | CAGTGTGGCTTCTTTGTGAACCATGAGCACATTGGGCCCGATGCAAAATG           |
| AGCCTCCTTCTGGAACCACTAGTGGGCGCTATGAGGCTCCACATGAGTGAGGCCAAAAAGC            |                                                              |
| TGCCTCCTTCTGGAACCACTAGTGGGCGCTATGAGGCTCCACATGAGTGAGGCCAAAAAGC            | CAGTGTGGCT                                                   |
| TGCCTCCTTCTGGAACCACTAGTGGGCGCTATGAGGCTCCACATGAGTGAGGCCAAAAAGC            | CAGTGTGGC                                                    |
| TGCCTCCTTCTGGAACCACTAGTGGGCGCTATGAGGCTCCACATGAGTGAGGCCAAAAAGC            | CAGTGTGGCT                                                   |
| TCTTCTGGAACCACTAGTGGGCGCTATGAGGCTCCACATGAGTGAGGCCAAAAAGC                 | CAGTGTGGCTTCTT                                               |
| TCTTCTGGAACCACTAGTGGGCGCTATGAGGCTCCACATGAGTGAGGCCAAAAAGC                 |                                                              |
| CCCTAGGGGCGCTATGAGGCTCCACATGAGTGAGGCCAAAAAGC                             |                                                              |
| ACATGAGTGAGGCCAAAAAGC                                                    | CAGTGTGGCTTCTTTGTGAACCATGAGCACATTGGGCCCGATGCAAAATGATC        |
| GCCTTACCACTGTGGCTTCTTTGTGAACCATGAGCACATTGGGCCCGATGCAAAATGATCCACAGATATCAC |                                                              |
| DNAH14 225333863                                                         | IKZF1 50367352                                               |
| CCACTAGTGGGCGCTATGAGGCTCCACATGAGTGAGGCCAAAAAGCCTG                        | CCACGACTCTGTCACTCTTGGAGCTTGTCTGTCTCCCGAGGTGGTGGAG            |
| GAACCACTAGTGGGCGCTATGAGGCTCCACATGAGTGAGGCCAAAAAGCCTG                     | CCACG                                                        |
| GAACCACTAGTGGGCGCTATGAGGCTCCACATGAGTGAGGCCAAAAAGCCTG                     | CTAATTAA                                                     |
| GAACCACTAGTGGGCGCTATGAGGCTCCACATGAGTGAGGCCAAAAAGCCTG                     | CCACGACTCTG                                                  |
| GAACCACTAGTGGGCGCTATGAGGCTCCACATGAGTGAGGCCAAAAAGCCTG                     | CCACGACTCTGT                                                 |
| GAACCACTAGTGGGCGCTATGAGGCTCCACATGAGTGAGGCCAAAAAGCCTG                     |                                                              |
| CCACTAGTGGGCGCTATGAGGCTCCACATGAGTGAGGCCAAAAAGCCTG                        | CCACG                                                        |
| CCCTAGGGGCGCTATGAGGCTCCACATGAGTGAGGCCAAAAAGCCTG                          |                                                              |
| GGCCTATGAGGCTCCACATGAGTGAGGCCAAAAAGCCTG                                  | CCACGACTCTGTCACTCTTGGAGCTTGTCTGTCTCCCGAGGTGGTGGAGAGGTCT      |
| ATGAGGCTCCACATGAGTGAGGCCAAAAAGCCTG                                       | CCACGACTCTGTCACTCTTGG                                        |
| CCCTTACCACTGTGGCTTCTTTGTGAACCATGAGCACATTGGGCCCGATGCAAAATGATC             | CCCTTACCACTGTGGCTTCTTTGTGAACCATGAGCACATTGGGCCCGATGCAAAATGATC |
| CTTACCACTGTGGCTTCTTTGTGAACCATGAGCACATTGGGCCCGATGCAAAATGATC               |                                                              |
| DNAH14 225333863                                                         | IKZF1 50444490                                               |
| CCACTAGTGGGCGCTATGAGGCTCCACATGAGTGAGGCCAAAAAGCCTG                        | CAGTGTGGCTTCTTTGTGAACCATGAGCACATTGGGCCCGATGCAAAATG           |
| GAACCACTAGTGGGCGCTATGAGGCTCCACATGAGTGAGGCCAAAAAGCCTG                     | CTAATTAA                                                     |
| GAACCACTAGTGGGCGCTATGAGGCTCCACATGAGTGAGGCCAAAAAGCCTG                     | CAGTGTGGCTT                                                  |
| GAACCACTAGTGGGCGCTATGAGGCTCCACATGAGTGAGGCCAAAAAGCCTG                     | CAGTGTGGCTT                                                  |
| GAACCACTAGTGGGCGCTATGAGGCTCCACATGAGTGAGGCCAAAAAGCCTG                     | CAGTGTGGCT                                                   |
| GAACCACTAGTGGGCGCTATGAGGCTCCACATGAGTGAGGCCAAAAAGCCTG                     | CAGTGTGGCT                                                   |
| GAACCACTAGTGGGCGCTATGAGGCTCCACATGAGTGAGGCCAAAAAGCCTG                     |                                                              |
| GAACCACTAGTGGGCGCTATGAGGCTCCACATGAGTGAGGCCAAAAAGCCTG                     | CAGTGTGGCTTCTTTGT                                            |
| GAACCACTAGTGGGCGCTATGAGGCTCCACATGAGTGAGGCCAAAAAGCCTG                     | CAGTGTGGCTTCTTTGT                                            |
| CCCTAGGGGCGCTATGAGGCTCCACATGAGTGAGGCCAAAAAGCCTG                          |                                                              |
| ACTAGTGGGCGCTATGAGGCTCCACATGAGTGAGGCCAAAAAGCCTG                          | CAGTGTGGCTTCTTTGTGAACCATG                                    |
| AGTGGGCGCTATGAGGCTCCACATGAGTGAGGCCAAAAAGCCTG                             | CAGTGTGGCTTCTTTGTGAACCATGAGC                                 |
| AGTGGGCGCTATGAGGCTCCACATGAGTGAGGCCAAAAAGCCTG                             | CAGTGTGGCTTCTTTGTGAACCATGAGC                                 |
| GTGGGCGCTATGAGGCTCCACATGAGTGAGGCCAAAAAGCCTG                              | CAGTGTGGCTTCTTTGTGAACCATGAGCA                                |
| GGGCGCTATGAGGCTCCACATGAGTGAGGCCAAAAAGCCTG                                | CAGTGTGGCTTCTTTGTGAACCATGAGCA                                |
| GGCCTATGAGGCTCCACATGAGTGAGGCCAAAAAGCCTG                                  | CAGTGTGGCTTCTTTGTGAACCATGAGCACAT                             |
| ATGAGGCTCCACATGAGTGAGGCCAAAAAGCCTG                                       | CAGTGTGGCTTCTTTGTGAACCATGAGCACATTGGG                         |
| TCCACATGAGTGAGGCCAAAAAGCCTG                                              | CAGTGTGGCTTCTTTGTGAACCATGAGCACATTGGGCCCGATGCAAAATGATC        |
| AGTGAAGGCCAAAAAGCCTG                                                     | CAGTGTGGCTTCTTTGTGAACCATGAGCACATTGGGCCCGATGCAAAATGAT         |
| AAAAGCCTG                                                                | CAGTGTGGCTTCTTTGTGAACCATGAGCACATTGGGCCCGATGCAAAATGAT         |
| GCCTTACCACTGTGGCTTCTTTGTGAACCATGAGCACATTGGGCCCGATGCAAAATGAT              | CAGTGTGGCTTCTTTGTGAACCATGAGCACATTGGGCCCGATGCAAAATGAT         |
| CAGTGTGGCTTCTTTGTGAACCATGAGCACATTGGGCCCGATGCAAAATGAT                     |                                                              |
| DNAH14 225346497                                                         | IKZF1 50444230                                               |
| TACATGACTGATGCTGGCACTGGAAGTGTCTACTGCCTCTGCTATTTCTG                       | CCAGTAATGTTAAAGTAGAGACTCAGAGTGATGAAGAGAATGGCGTGCC            |
| ATACCAATACATGACTGATGCTGGCACTGGAAGTGTCTACTGCCTCTGCTATTTCTG                |                                                              |
| ATACCAATACATGACTGATGCTGGCACTGGAAGTGTCTACTGCCTCTGCTATTTCTG                |                                                              |
| GGAACTGCTACTGCCTCTGCTATTTCTG                                             | CCAGTAATGTTAAAGTAGAGACTCAGAGTGATGAAGAGAATGGG                 |
|                                                                          | TTACCCAGTAATGTTAAAGTAGAGACTCAGAGTGATGAAGAGAATGGCGTGCTGTGAAT  |
|                                                                          | CCAGTAATGTTAAAGTAGAGACTCAGAGTGATGAAGAGAATGGCGTGCTGTGAAT      |
| DNAH14 225347499                                                         | IKZF1 50367352                                               |
| CTTTTGAATGAGGATAATAGTGTCTGTTCTTCCACTTTGAAAGGGTGC                         | CCACGACTCTGTCACTCTTGGAGCTTGTCTGTCTCCCGAGGTGGTGGAG            |
| TTTCATCTTTTGAATGAGGATAATAGTGTCTGTTCTTCCACTTTGAAAGGGTGC                   | CCACGACT                                                     |
| ATGAGGATAATAGTGTCTGTTCTTCCACTTTGAAAG                                     |                                                              |
| CTGTTCTTCCACTTTGAAAGGGTGC                                                | CCACGACTCTGTCACTCTTGGAGCTTGTCTGTCTCCCGAGGTGGTGG              |
| CTGTTCTTCCACTTTGAAAGGGTGC                                                | CCACGACTCTGTCACTCTTGGAGCTTGTCTGTCTCCCGAGGTGGTGG              |
| TCTTCCACTTTGAAAGGGTGC                                                    | CCACGACTCTGTCACTCTTGGAGCTTGTCTGTCTCCCGAGGTGGTGG              |
| TCTTCCACTTTGAAAGGGTGC                                                    | CCACGACTCTGTCACTCTTGGAGCTTGTCTGTCTCCCGAGGTGGTGG              |
| CCACTTACCACTGTCTGTCACTCTTGGAGCTTGTCTGTCTCCCGAGGTGGTGGAGGTCTCTG           |                                                              |

1

2

3

4

5

6

7

**Supplementary Figure 2. DNAH14-IKZF1 fusion transcript.** Alignment of sequence reads mapping across the *DNAH14-IKZF1* fusion genes. The nucleotide position and sequence of the assembled fusion transcript appears at the top and reads are showing below it and the vertical line indicates the fusion point. The data were obtained from RNA-seq analysis of the 179MO case transcriptome using the TopHat-Fusion.

|                                                        |                                                           |
|--------------------------------------------------------|-----------------------------------------------------------|
| <b>DNAH14</b> 225354984                                | <b>IKZF1</b> 50367352                                     |
| TTCTGTCTCAATGTAGGGATGCAAGGAATGAAAAATGGAATGGAAGAGAT     | CCACGACTCTGTCACTCTTGGAGCTTTGCTGCTCCCGAGGTGGTGGAG          |
| TTCTGTCTCAATGTAGGGATGCAAGGAATGAAAAATGGAATGGAAGAGATC    |                                                           |
| CTGTCTCAATGTAGGGATGCAAGGAATGAAAAATGGAATGGAAGAGAT       | CCACGACTCTGTCACTCTTGGAGCT                                 |
| CTCAATGTAGGGATGCAAGGAATGAAAAATGGAATGGAAGAGAT           | CCACGACTCTGTCACTCTTGGAGCTTTGCT                            |
|                                                        | CCACTTACCACGACTCTGTCACTCTTGGAGCTTTGCTGCTCCCGAGGTGGTGGAGAG |
| <b>DNAH14</b> 225354984                                | <b>IKZF1</b> 50435762                                     |
| TTCTGTCTCAATGTAGGGATGCAAGGAATGAAAAATGGAATGGAAGAGAT     | GAGAGAAAGATTGGGAATTATTGCATGGAAATCCCTAAAGTCATCAGCC         |
| TGTCTCAATGTAGGGATGCAAGGAATGAAAAATGGAATGGAAGAGATC       |                                                           |
| TCAATGTAGGGATGCAAGGAATGAAAAATGGAATGGAAGAGAT            | GAGAGAAAGATTGGGAATTATTGCATGG                              |
| TCAATGTAGGGATGCAAGGAATGAAAAATGGAATGGAAGAGAT            | GAGAGAAAGATTGGGAATTATTGCATGG                              |
| GGATGCAAGGAATGAAAAATGGAATGGAAGAGAT                     | GAGAGAAAGATTGGGAATTATTGCATGGAAATCCCTAAAGTCATCA            |
| AATGAAAAATGGAATGGAAGAGAT                               | GAGAGAAAGATTGGGAATTATTGCATGGAAATCCCTAAAGTCATCA            |
| GAAAAATGGAATGGAAGAGAT                                  | GAGAGAAAGATTGGGAATTATTGCATGGAAATCCCTAAAGTCATCA            |
|                                                        | TACGAGAGAAATGATTGGGAATTATTGCATGGAAATCCCTAAAGTCATCA        |
| <b>DNAH14</b> 225354984                                | <b>IKZF1</b> 50444490                                     |
| TTCTGTCTCAATGTAGGGATGCAAGGAATGAAAAATGGAATGGAAGAGAT     | CAGTGTGGCTTCTTTTGTGAACCATGAGCACATTGGGCCCGATGCAAAATG       |
| TTTGTCTCTCTCAATGTAGGGATGCAAGGAATGAAAAATGGAATGGAAGAGAT  | CAGTGTGGCTT                                               |
| TTTGTCTCTCTCAATGTAGGGATGCAAGGAATGAAAAATGGAATGGAAGAGAT  | CAGTGTGGCTT                                               |
| TTTGTCTCTCTCAATGTAGGGATGCAAGGAATGAAAAATGGAATGGAAGAGATC |                                                           |
| TCTGTCTCAATGTAGGGATGCAAGGAATGAAAAATGGAATGGAAGAGAT      | CAGTGTGGCTTCTTTTG                                         |
| TCTGTCTCAATGTAGGGATGCAAGGAATGAAAAATGGAATGGAAGAGAT      | CAGTGTGGCTTCTTTTGTGATCCAT                                 |
| TCTGTCTCAATGTAGGGATGCAAGGAATGAAAAATGGAATGGAAGAGAT      | CAGTGTGGCTTCTTTTGTGAACC                                   |
| CTCAATGTAGGGATGCAAGGAATGAAAAATGGAATGGAAGAGAT           | CAGTGTGGCTTCTTTTGTGAACCATG                                |
| CTCAATGTAGGGATGCAAGGAATGAAAAATGGAATGGAAGAGAT           | CAGTGTGGCTTCTTTTGTGAACCATG                                |
| TCAATGTAGGGATGCAAGGAATGAAAAATGGAATGGAAGAGAT            | CAGTGTGGCTTCTTTTGTGAACCATGAGCAC                           |
| CAATGTAGGGATGCAAGGAATGAAAAATGGAATGGAAGAGAT             | CAGTGTGGCTTCTTTTGTGAACCATGAGC                             |
| CAATGTAGGGATGCAAGGAATGAAAAATGGAATGGAAGAGAT             | CAGTGTGGCTTCTTTTGTGAACCATGAGCAC                           |
| AGGGATGCAAGGAATGAAAAATGGAATGGAAGAGAT                   | CAGTGTGGCTTCTTTTGTGAACCATGAGCACATTGGG                     |
| AGGGATGCAAGGAATGAAAAATGGAATGGAAGAGAT                   | CAGTGTGGCTTCTTTTGTGAACCATGAGCACATTGG                      |
| GATGCAAGGAATGAAAAATGGAATGGAATGAGAT                     | CAGTGTGGCTTCTTTTGTGAACCATGAGCCATTGGGCCCG                  |
| GATGCAAGGAATGAAAAATGGAATGGAAGAGAT                      | CAGTGTGGCTTCTTTTGTGAACCATGAGCACATTGGGCCCG                 |
| GAAAAATGGAATGGAAGAGAT                                  | CAGTGTGGCTTCTTTTGTGAACCATGAGCACATTGGGCCCGATGCAAAATGATC    |
| AAATGGAATGGAAGAGAT                                     | CAGTGTGGCTTCTTTTGTGAACCATGAGCACATTGGGCCCGATGCAAAATGATCCCA |
| AAATGGAATGGAAGAGAT                                     | CAGTGTGGCTTCTTTTGTGAACCATGAGCACATTGGGCCCGATGCAAAATGATCCC  |
| GCCTTAC                                                | CAGTGTGGCTTCTTTTGTGAACCATGAGCACATTGGGCCCGATGCAAAATGATCCCA |
| <b>DNAH14</b> 225374260                                | <b>IKZF1</b> 50448363                                     |
| TTTAAGTACAAAAGTAGTACATATAATTGTGAGAAATTTGGAAAAATAAAA    | CCAACTACAGCTCTCATTTGGACAGGGTGGCCTCTCAGGAGAAAGCTCAT        |
| AAGTACAAAAGTAGTACATATAATTGTGAGAAATTTGGAAAAATAAAA       |                                                           |
| AAGTACAAAAGTAGTACATATAATTGTGAGAAATTTGGAAAAATAAAA       | CCAACTACAGCTC                                             |
| CAAAAGTAGTACATATAATTGTGAGAAATTTGGAAAAATAAAA            | CCAACTACAGCTCTCATTTGGACAGGGTGG                            |
| TTGTGAGAAATTTGGAAAAATAAAA                              | CCAACTACAGCTCTCATTTGGACAGGGTGGCCTCTCAGGAGAAAGCTCAT        |
| GAAATTTGGAAAAATAAAA                                    | CCAACTACAGCTCTCATTTGGACAGGG                               |
| GAAATTTGGAAAAATAAAA                                    | CCAACTACAGCTCTCATTTGGACAGGGTGGCCTCTCAGG                   |

1  
2  
3  
4

Supplementary Figure 2. Continued



**ETV6-SNUPN fusion gene**

| ETV6 11905512                                          | SNUPN 75913396                                        |
|--------------------------------------------------------|-------------------------------------------------------|
| TCGAGCGCTCAGGATGGAGGAAGACTCGATCCGCCTGCCTGCGCACCTGC     | GGAAGATGGAAGAGTTGAGTCAGGCCCTGGCTAGTAGCTTTTCTGTGTCT    |
| TGCCTCG                                                |                                                       |
| TGCCTCGAGCG                                            |                                                       |
| TGCCTCGAGCGCTCAGGATGGAGG                               |                                                       |
| TGCCTCGCGCGCTCAGGATCGAGGAAGACTCG                       |                                                       |
| TGCCTCGAGCGCTCAGGATGGAGGAAGACTCGATCCGC                 |                                                       |
| TGCCTCGAGCGCTCAGGATGGAGGAAGACTCGATCCGCCTGCCTGCGC       |                                                       |
| TGCCTCGAGCGCTCAGGATGGAGGAAGACTCGATCCGCCTGCCTGCGCACCTGC |                                                       |
| CGAGCGCTCAGGATGGAGGAAGACTCGATCCGCCTGCCTGCGCACCTGC      | GGAAGATGGAAGAGTTGAGTCAG                               |
| AGCGCTCAGGATGGAGGAAGACTCGATCCGCCTGCCTGCGCACCTGC        | GGAAGATGGAAGAGTTGAGTCAGGCCCTGGCTAGTAGCTTTTCTGTGTCT    |
| AAGACTCGATCCGCCTGCCTGCGCACCTGC                         | GGAAGATGGAAGAGTTGAGTCAGGCCCTGGCTAGTAGCTTTTCTGTGTCT    |
| AGACTCGATCCGCCTGCCTGCGCACCTGC                          | GGAAGATGGAAGAGTTGAGTCAGGCCCTGGCTAGTAGCTTTTCTGTGTCT    |
| CGATCCGCCTGCCTGCGCACCTGC                               | GGAAGATGGAAGAGTTGAGTCAGGCCCTGGCTAGTAGCTTTTCTGTGTCTCAA |
|                                                        | GATGGAAGAGTTGAGTCAGGCCCTGGCTAGTAGCTTTTCTGTGTCTCAA     |
|                                                        | GAAGAGTTGAGTCAGGCCCTGGCTAGTAGCTTTTCTGTGTCTCAA         |
|                                                        | TTGAGTCAGGCCCTGGCTAGTAGCTTTTCTGTGTCTCAA               |
|                                                        | CAGGCCCTGGCTAGTAGCTTTTCTGTGTCTCAA                     |
|                                                        | CCTGGCTAGTAGCTTTTCTGTGTCTCAA                          |
|                                                        | GGCTAGTAGCTTTTCTGTGTCTCAA                             |
|                                                        | TAGTAGCTTTTCTGTGTCTCAA                                |
|                                                        | TAGCTTTTCTGTGTCTCAA                                   |
|                                                        | CTTTTCTGTGTCTCAA                                      |
|                                                        | A                                                     |

**Supplementary Figure 3. ETV6-SNUPN fusion transcript.** Alignment of sequence reads mapping across the *ETV6-SNUP* fusion gene. The sequence of the assembled fusion transcript appears at the top and reads are showing below it and the vertical line indicates the fusion point. The data were obtained from RNA-seq analysis of the 28MO case transcriptome using the TopHat-Fusion.

**ETV6-NUFIP1 fusion gene**

| ETV6 11803093                                            | NUFIP1 45540070                                          |
|----------------------------------------------------------|----------------------------------------------------------|
| CTCTCTCGCTGTGAGACATGTCTGAGACTCCTGCTCAGTGTAGCATTAAAG      | AAACTATCCAACCTCTGGCCAATATTGAAAGGAAGAAGATTAAACCTTG        |
| CTGATCTCTCTCGCTGTGAGACATGTCTGAGACTCCTGCTCAGTGTAGCATT     |                                                          |
| CTGATCTCTCTCGCTGTGAGACATGTCTGAGACTCCTGCTCAGTGTAGCATTAAAG | AAACTATCC                                                |
| CTGATCTCTCTCGCTGTGAGACATGTCTGAGACTCCTGCTCAGTGTAGCATTAAAG | AAACTATCCAACCTCTGG                                       |
| TGATCTCTCTCGCTGTGAGACATGTCTGAGACTCCTGCTCAGTGTAGCATTAAAG  | AAACTATCCAACCTCTGGCC                                     |
| TGATCTCTCTCGCTGTGAGACATGTCTGAGACTCCTGCTCAGTGTAGCATTAAAG  | AAACTATCCAACCTCTGGCC                                     |
| ATCTCTCTCGCTGTGAGACATGTCTGAGACTCCTGCTCAGTGTAGCATTAAAG    | AAACTATCCAACCTCTGGCCAAAT                                 |
| TCTCTCTCGCTGTGAGACATGTCTGAGACTCCTGCTCAGTGTAGCATTAAAG     | AAACTATCCAACCTCTGGCCAAAT                                 |
| CGCTGTGAGACATGTCTGAGACTCCTGCTCAGTGTAGCATTAAAG            | AAACTATCCAACCTCTGG                                       |
| CGCTGTGAGACATGTCTGAGACTCCTGCTCAGTGTAGCATTAAAG            | AAACTATCCAACCTCTGGCC                                     |
| CTGTGAGACATGTCTGAGACTCCTGCTCAGTGTAGCATTAAAG              | AAACTATCCAACCTCTGGCCAAATATTGAAAGG                        |
| GTGAGACATGTCTGAGACTCCTGCTCAGTGTAGCATTAAAG                | AAACTATCCAACCTCTGGCCAAATATTGAAAGGA                       |
| GACATGTCTGAGACTCCTGCTCAGTGTAGCATTAAAG                    | AAACTATCCAACCTCTGGCCAAATATTGAAAGGA                       |
| CCTGCTCAGTGTAGCATTAAAG                                   | AAACTATCCAACCTCTGGCCAAATATTGAAAGGAAGAAGATTAAACCTTGA      |
| GTAGCATTAAAG                                             | AAACTATCCAACCTCTGGCCAAATATTGAAAGGAAGAAGATTAAACCTTGAAGAAG |
| GTAGCATTAAAG                                             | AAACTATCCAACCTCTGGCCAAATATTGAAAGGAAGAAGATTAAACCTTGAAGAAG |
| GTAGCATTAAAG                                             | AAACTATCCAACCTCTGGCCAAATATTGAAAGGAAGAAGATTAAACCTTGAAGAAG |
| AGCATTAAAG                                               | AAACTATCCAACCTCTGGCCAAATATTGAAAGGAAGAAGATTAAACCTTGAAGAAG |
| AGCATTAAAG                                               | AAACTATCCAACCTCTGGCCAAATATTGAAAGGAAGAAGATTAAACCTTGAAGAAG |
| GCATTAAAG                                                | AAACTATCCAACCTCTGGCCAAATATTGAAAGGAAGAAGATTAAACCTTGAAGAAG |
|                                                          | AACTATCCAACCTCTGGCCAAATATTGAAAGGAAGAAGATTAAACCTTGAAGAAG  |
|                                                          | ATCCAACCTCTGGCCAAATATTGAAAGGAAGAAGATTAAACCTTGAAGAAG      |
|                                                          | CAACTCTGGCCAAATATTGAAAGGAAGAAGATTAAACCTTGAAGAAG          |

**Supplementary Figure 4. ETV6-NUFIP1 fusion transcript.** Alignment of sequence reads mapping across the *ETV6-NUFIP1* fusion gene. The nucleotide position and sequence of the assembled fusion transcript appears at the top and reads are showing below it and the vertical line indicates the fusion point. The data were obtained from RNA-seq analysis of the 28MO case transcriptome using the TopHat-Fusion.

[illegible]

**Supplementary Figure 5. EP300-ZNF384 fusion transcript.** Alignment of sequence reads mapping across the EP300-ZNF384 fusion gene. The nucleotide position and sequence of the assembled fusion transcript appears at the top and reads are showing below it and the vertical line indicates the fusion point. The data were obtained from RNA-seq analysis of the 197MO case transcriptome using the TopHat-Fusion.
