# Supplementary material for: Identification and Characterization of Novel Fusion Genes with Potential Clinical Applications in Mexican Children with Acute Lymphoblastic Leukemia
Source: MDPI journal article supplement (doi:10.3390/ijms20102394), 2019-05-15
Supplement: s1 [file s1]

CREBBP-SRGAP2B fusion gene

CREBBP 3929832

SRGAP2B 144013900

|                                                             |                                                          |
|-------------------------------------------------------------|----------------------------------------------------------|
| CAAAAGAGCCAAACTCAGCTCGCCCGGTTTCTCGGCGAATGACAGCACAG          | AGATCCGTGCTCAGCTCACAGAGCAGATGAAATGCCTGGACCAGCAGTGT       |
| TAACCCCAAAAGAGCCAAACTCAGCTCGCCCGGTTTCTCGGCGAATGACAGC        |                                                          |
| TAACCCCAAAAGAGCCAAACTCAGCTCGCCCGGTTTCTCGGCGAATGACAGCACAG    | AGATCCGT                                                 |
| TAACCCCAAAAGAGCCAAACTCAGCTCGCCCGGTTTCTCGGCGAATGACAGCACAG    | AGATCCGT                                                 |
| TAACCCCAAAAGAGCCAAACTCAGCTCGCCCG                            |                                                          |
| TAACCCCAAAAGAGCCAAACTCAGCTCGCCCGGTTTCTCGGCGAATGACAGCACAG    | AGATCCGTGC                                               |
| TAACCCCAAAAGAGCCAAACTCAGCTCGCCCGGTTTCTCGGCGAATGACAGCACAG    | AGCTCCGTGCTCAGCTC                                        |
| CCAAAAGAGCCAAACTCAGCTCGCCCGGTTTCTCGGCCAATGACAGCAC           |                                                          |
| AAGAGCCAAACTCAGCTCGCCCGGTTTCTCGGCGAATGACAGCACAG             | AGCTCCGTGCTCAGCTC                                        |
| AGAGCCAAACTCAGCTCGCCCGGTTTCTCGGCGAATGACAGCACAG              | AGATCCGTGCTCAGCTCAC                                      |
| CAAACCTCAGCTCGCCCGGTTTCTCGGCGAATGACAGCACAG                  | AGATCCGTGCTCAGCTCACAGAGCAGATGAAAT                        |
| AAACTCAGCTCGCCCGGTTTCTCGGCGAATGACAGCACAG                    | AGATCCGTGCTCAGCTCACAGAGCAGATGTAATG                       |
| AACTCAGCTCGCCCGGTTTCTCGGCGAATGACAGCACAG                     | AGATCCGTGCTCAGCTCACAGAGCAGATGAAATG                       |
| CAGCTCGCCCGGTTTCTCGGCGAATGACAGCACAG                         | AGATCCGTGCTCAGCTCACAGAGCAGATGAAATGCCTG                   |
| CAGCTCGCCCGGTTTCTCGGCGAATGACAGCACAG                         | AGATCCGTGCTCAGCTCACAGAGCAGATGAAATGCCTG                   |
| CGGTTTCTCGGCGAATGACAGCACAG                                  | AGATCCGTGCTCAGCTCACAGAGCAGATGAAATGCCTGGACCAGC            |
| GGTTTCTCGGCGAATGACAGCACAG                                   | AGATCCGTGCTCAGCTCACAGAGCAGATGAAATGCCTGGACCAGCAGTG        |
| GGTTTCTCGGCGAATGACAGCACAG                                   | AGATCCGTGCTCAGCTCACAGAGCAGATGAAATGCCTGGACCAGCAGTG        |
| TTCTCGGCGAATGACAGCACAG                                      | AGATCCGTGCTCAGCTCACAGAGCAGATG                            |
| CGGCGAATGACAGCACAG                                          | AGATCCGTGCTCAGCTCACAGAGCAGATGAAATGCCTGGACCAGCAGTGTGAG    |
| CGGCGAATGACAGCACAG                                          | AGATCCGTGCTCAGCTCACAGAGCAGATGAAATGCCTGGACCAGCAGTGTGAGCTT |
| CGGCGAATGACAGCACAG                                          | AGATCCGTGCTCAGCTCACAGAGCAGATGAAATGCCTGGACCAGCAGTGTGAGCTT |
| GCGAATGACAGCACAG                                            | AGATCCGTGCTCAGCTCACAGAGCAGATGAAATGCCTGGACCAGCAGTGTGAGCTT |
| CAGCACAG                                                    | AGATCCGTGCTCAGCTCACAGAGCAGATGAAATGCCTGGACCAGCAGTGTGAGCTT |
| CACAG                                                       | AGATCCGTGCTCAGCTCACAGAGCAGATGAAATGCCTGGCCCAGCAGTGTG      |
| CAGAGATCCGTGCTCAGCTCACAGAGCAGATGAAATGCCTGGACCAGCAGTGTGAGCTT |                                                          |
|                                                             | AGATCCGTGCTCAGCTCACAGAGCAGATGAAATGCCTGGACCAGCAGTGTGAGCTT |
