# Supplementary material for: Identification and Characterization of Novel Fusion Genes with Potential Clinical Applications in Mexican Children with Acute Lymphoblastic Leukemia
Source: MDPI journal article supplement (doi:10.3390/ijms20102394), 2019-05-15
Supplement: s1 [file s1]

ETV6-SNUPN fusion gene

ETV6 11905512

SNUPN 75913396

|                                                       |                                                       |
|-------------------------------------------------------|-------------------------------------------------------|
| TCGAGCGCTCAGGATGGAGGAAGACTCGATCCGCCTGCCTGCGCACCTGC    | GGAAGATGGAAGAGTTGAGTCAGGCCCTGGCTAGTAGCTTTTCTGTGTCT    |
| TGCCTCG                                               |                                                       |
| TGCCTCGAGCG                                           |                                                       |
| TGCCTCGAGCGCTCAGGATGGAGG                              |                                                       |
| TGCCTCGCGCGCTCAGGATCGAGGAAGACTCG                      |                                                       |
| TGCCTCGAGCGCTCAGGATGGAGGAAGACTCGATCCGC                |                                                       |
| TGCCTCGAGCGCTCAGGATGGAGGAAGACTCGATCCGCCTGCCTGCGC      |                                                       |
| TGCCTCGAGCGCTCAGGATGGAGGAAGACTCGATCCGCCTGCCTGCGCACCTG |                                                       |
| CGAGCGCTCAGGATGGAGGAAGACTCGATCCGCCTGCCTGCGCACCTGC     | GGAAGATGGAAGAGTTGAGTCAG                               |
| AGCGCTCAGGATGGAGGAAGACTCGATCCGCCTGCCTGCGCACCTGC       | GGAAGATGGAAGAGTTGAGTCAGGCC                            |
| AAGACTCGATCCGCCTGCCTGCGCACCTGC                        | GGAAGATGGAAGAGTTGAGTCAGGCCCTGGCTAGTAGCTTTTCT          |
| AGACTCGATCCGCCTGCCTGCGCACCTGC                         | GGAAGATGGAAGAGTTGAGTCAGGCCCTGGCTAGTAGCTTTTCTG         |
| CGATCCGCCTGCCTGCGCACCTGC                              | GGAAGATGGAAGAGTTGAGTCAGGCCCTGGCTAGTAGCTTTTCTGTGTCT    |
|                                                       | GGAAGATGGAAGAGTTGAGTCAGGCCCTGGCTAGTAGCTTTTCTGTGTCTCAA |
|                                                       | GATGGAAGAGTTGAGTCAGGCCCTGGCTAGTAGCTTTTCTGTGTCTCAA     |
|                                                       | GAAGAGTTGAGTCAGGCCCTGGCTAGTAGCTTTTCTGTGTCTCAA         |
|                                                       | TTGAGTCAGGCCCTGGCTAGTAGCTTTTCTGTGTCTCAA               |
|                                                       | CAGGCCCTGGCTAGTAGCTTTTCTGTGTCTCAA                     |
|                                                       | CCTGGCTAGTAGCTTTTCTGTGTCTCAA                          |
|                                                       | GGCTAGTAGCTTTTCTGTGTCTCAA                             |
|                                                       | TAGTAGCTTTTCTGTGTCTCAA                                |
|                                                       | TAGCTTTTCTGTGTCTCAA                                   |
|                                                       | CTTTTCTGTGTCTCAA                                      |
|                                                       | A                                                     |
