# Supplementary material for: Identification and Characterization of Novel Fusion Genes with Potential Clinical Applications in Mexican Children with Acute Lymphoblastic Leukemia
Source: MDPI journal article supplement (doi:10.3390/ijms20102394), 2019-05-15
Supplement: s1 [file s1]

# EP300-ZNF385 fusion gene

ZNF384 6788687

EP300 41527639

| GATAGAAGGCCAGAAGTACGGGTTAGAATTGAAGTGAGATTCTTCCATT               | TACTCATGTTGCTCATGGGCCGCATGCCTTGGGGAGACTGCCCAGGCTGC |
|-----------------------------------------------------------------|----------------------------------------------------|
| CCTGAGACTGTGGGGATAGAAGGCCAGAAGTACGGGTTAGAATTGAAGTGAGATTCTTCCATT |                                                    |
| CCTGAGACTGTGGGGATAGAAGGCCAGAAGTACGGGTTAGAATTGAAGTGAGATTCTTCCATT | TACTCATG                                           |
| CCTGAGACTGTGGGGATAGAAGGCCAGAAGTACGGGTTAGAATTGAAGTGAGATTCTTCCATT | TACTCATGTT                                         |
| CCTGAGACTGTGGGGATAGAAGGCCAGAAGTACGGGTTAGAATTGAAGTGAGATTCTTCCATT | TACTCATGTT                                         |
| GAGACTGTGGGGATAGAAGGCCAGAAGTACGGGTTAGAATTGAAGTGAGATTCTTCCATT    | TACTCATGTTGC                                       |
| GAGACTGTGGGGATAGAAGGCCAGCAGTACGGGGTAGAATTGAAGTGAGATTCTTCCATT    | TACTCATGTTGC                                       |
| GGGATAGAAGGCCAGAAGTACGGGTTAGAATTGAAGTGAGATTCTTCCATT             | TACTCATGTTGCTCATGGGCCG                             |
| GGATAGAAGGCCAGAAGTACGGGTTAGAATTGAAGTGAGATTCTTCCATT              | TACTCATGTTGCTCATGGGCCG                             |
| GGATAGAAGGCCAGAAGTACGGGTTAGAATTGAAGTGAGATTCTTCCATT              | TACTCATGTTGCTCATGGGCCG                             |
| GATAGAAGGCCAGAAGTACGGGTTAGAATTGAAGTGAGATTCTTCCATT               | TACTCATGTTGCTCATGGGCCG                             |
| GATAGAAGGCCAGAAGTACGGGTTAGAATTGAAGTGAGATTCTTCCATT               | TACTCATGTTGCTCATGGGCCG                             |
| ATAGAAGGCCAGAAGTACGGGTTAGAATTGAAGTGAGATTCTTCCATT                | TACTCATGTTGCTCATGGGCCG                             |
| AGAAGGCCAGAAGTACGGGTTAGAATTGAAGTGAGATTCTTCCATT                  | TACTCATGTTGCTCATGGGCCG                             |
| GAAGGCCAGAAGTACGGGTTAGAATTGAAGTGAGATTCTTCCATT                   | TACTCATGTTGCTCATGGGCCG                             |
| GGCCAGAAGTACGGGTTAGAATTGAAGTGAGATTCTTCCATT                      | TACTCATGTTGCTCATGGGCCG                             |
| GGCCAGAAGTACGGGTTAGAATTGAAGTGAGATTCTTCCATT                      | TACTCATGTTGCTCATGGGCCG                             |
| GCCAGAAGTACGGGTTAGAATTGAAGTGAGATTCTTCCATT                       | TACTCATGTTGCTCATGGGCCG                             |
| CAGAAGTACGGGTTAGAATTGAAGTGAGATTCTTCCATT                         | TACTCATGTTGCTCATGGGCCG                             |
| CGGGTTAGAATTGAAGTGAGATTCTTCCATT                                 | TACTCATGTTGCTCATGGGCCG                             |
| GGTTAGAATTGAAGTGAGATTCTTCCATT                                   | TACTCATGTTGCTCATGGGCCG                             |
| GGTTAGAATTGAAGTGAGATTCTTCCATT                                   | TACTCATGTTGCTCATGGGCCG                             |
| ATAATTGAAGTGAGATTCTTCCATT                                       | TACTCATGTTGCTCATGGGCCG                             |
| GAAGTGAGATTCTTCCATT                                             | TACTCATGTTGCTCATGGGCCG                             |
| GAAGTGAGATTCTTCCATT                                             | TACTCATGTTGCTCATGGGCCG                             |
| GAAGTGAGATTCTTCCATT                                             | TACTCATGTTGCTCATGGGCCG                             |
| GAGATTCTTCCATT                                                  | TACTCATGTTGCTCATGGGCCG                             |
| GAGATTCTTCCATT                                                  | TACTCATGTTGCTCATGGGCCG                             |
| TCCATT                                                          | TACTCATGTTGCTCATGGGCCG                             |
| CCATT                                                           | TACTCATGTTGCTCATGGGCCG                             |
| CCATT                                                           | TACTCATGTTGCTCATGGGCCG                             |
| CCATT                                                           | TACTCATGTTGCTCATGGGCCG                             |
| CATT                                                            | TACTCATGTTGCTCATGGGCCG                             |
