# Supplementary material for: Identification and Characterization of Novel Fusion Genes with Potential Clinical Applications in Mexican Children with Acute Lymphoblastic Leukemia
Source: MDPI journal article supplement (doi:10.3390/ijms20102394), 2019-05-15
Supplement: s1 [file s1]

DNAH14 225354984

IKZF1 50367352

TTCTGTCTCAATGTAGGGATGCAAGGAATGAAAAATGGAATGGAAGAGAT

CCACGACTCTGTCACTCTTGGAGCTTTGCTGTCTCCCGAGGTGGTGGAG

TTCTGTCTCAATGTAGGGATGCAAGGAATGAAAAATGGAATGGAAGAGATC  
CTGTCTCAATGTAGGGATGCAAGGAATGAAAAATGGAATGGAAGAGAT  
CTCAATGTAGGGATGCAAGGAATGAAAAATGGAATGGAAGAGAT  
CCACTTAC

CCACGACTCTGTCACTCTTGGAGCT  
CCACGACTCTGTCACTCTTGGAGCTTTGCT  
CCACGACTCTGTCACTCTTGGAGCTTTGCTGTCTCCCGAGGTGGTGGAGAG

DNAH14 225354984

IKZF1 50435762

TTCTGTCTCAATGTAGGGATGCAAGGAATGAAAAATGGAATGGAAGAGAT

GAGAGAAAGATTGGGAATTATTGCATGGAAATCCCTAAAGTCATCAGCC

TGTCTCAATGTAGGGATGCAAGGAATGAAAAATGGAATGGAAGAGATC  
TCAATGTAGGGATGCAAGGAATGAAAAATGGAATGGAAGAGAT  
TCAATGTAGGGATGCAAGGAATGAAAAATGGAATGGAAGAGAT  
GGATGCAAGGAATGAAAAATGGAATGGAAGAGAT  
AATGAAAAATGGAATGGAAGAGAT  
GAAAAATGGAATGGAAGAGAT

GAGAGAAAGATTGGGAATTATTGCATGG  
GAGAGAAAGATTGGGAATTATTGCATG  
GAGAGAAAGATTGGGAATTATTGCATGGAAATCCCT  
GAGAGAAAGATTGGGAATTATTGCATGGAAATCCCTAAAGTCATCA  
GAGAGAAAGATTGGGAATTATTGCATGGAAATCCCTAAAGTCATCA  
TACGAGAGAATGATTGGGAATTATTGCATGGAAATCCCTAAAGTCATCA

DNAH14 225354984

IKZF1 50444490

TTCTGTCTCAATGTAGGGATGCAAGGAATGAAAAATGGAATGGAAGAGAT

CAGTGTGGCTTCTTTGTGAACCATGAGCACATTGGGCCCGATGCAAATG

TTTGTCTGTCTCAATGTAGGGATGCAAGGAATGAAAAATGGAATGGAAGAGAT  
TTTGTCTGTCTCAATGTAGGGATGCAAGGAATGAAAAATGGAATGGAAGAGAT  
TTTGTCTGTCTCAATGTAGGGATGCAAGGAATGAAAAATGGAATGGAAGAGATC  
TTTGTCTGTCTCAATGTAGGGATGCAAGGAATGAAAAATGGAATGGAAGAGAT  
TCTGTCTCAATGTAGGGATGCAAGGAATGAAAAATGGAATGGAAGAGAT  
TCTGTCTCAATGTAGGGATGCAAGGAATGAAAAATGGAATGGAAGAGAT  
CTCAATGTAGGGATGCAAGGAATGAAAAATGGAATGGAAGAGAT  
CTCAATGTAGGGATGCAAGGAATGAAAAATGGAATGGAAGAGAT  
TCAATGTAGGGATGCAAGGAATGAAAAATGGAATGGAAGAGAT  
CAATGTAGGGATGCAAGGAATGAAAAATGGAATGGAAGAGAT  
CAATGTAGGGATGCAAGGAATGAAAAATGGAATGGAAGAGAT  
AGGGATGCAAGGAATGAAAAATGGAATGGAAGAGAT  
AGGGATGCAAGGAATGAAAAATGGAATGGAAGAGAT  
GATGCAAGGAATGAAAAATGGAATGGATGAGAT  
GATGCAAGGAATGAAAAATGGAATGGAAGAGAT  
GAAAAATGGAATGGAAGAGAT  
AAATGGAATGGAAGAGAT  
AAATGGAATGGAAGAGAT  
GCCTTAC

CAGTGTGGCTTCTTTGTGAACCATGAGCACATTGGGCCCGATGCAAATG  
CAGTGTGGCTT  
CAGTGTGGCTT  
CAGTGTGGCTTCTTTTG  
CAGTGTGGCTTCTTTTGTGATCCAT  
CAGTGTGGCTTCTTTTGTGAACC  
CAGTGTGGCTTCTTTTGTGAACCATG  
CAGTGTGGCTTCTTTTGTGAACCATG  
CAGTGTGGCTTCTTTTGTGAACCATGAGCAC  
CAGTGTGGCTTCTTTTGTGAACCATGAGC  
CAGTGTGGCTTCTTTTGTGAACCATGAGCAC  
CAGTGTGGCTTCTTTTGTGAACCATGAGCACATTGGG  
CAGTGTGGCTTCTTTTGTGAACCATGAGCACATTGG  
CAGTGTGGCTTCTTTTGTGAACCATGAGCCCATTGGGCCCG  
CAGTGTGGCTTCTTTTGTGAACCATGAGCACATTGGGCCCG  
CAGTGTGGCTTCTTTTGTGAACCATGAGCACATTGGGCCCGATGCAAATGATC  
CAGTGTGGCTTCTTTTGTGAACCATGAGCACATTGGGCCCGATGCAAATGATCCCA  
CAGTGTGGCTTCTTTTGTGAACCATGAGCACATTGGGCCCGATGCAAATGATCCC  
CAGTGTGGCTTCTTTTGTGAACCATGAGCACATTGGGCCCGATGCAAATGATCCCA

DNAH14 225374260

IKZF1 50448363

TTTAAGTACAAAAGTAGTACATATAATTGTGAGAAATTTGGAAAATAAAA

CCAACTACAGCTCTCATTTGGACAGGGTGGCCTCTCAGGAGAAAGCTCAT

AAGTACAAAAGTAGTACATATAATTGTGAGAAATTTGGAAAAT  
AAGTACAAAAGTAGTACATATAATTGTGAGAAATTTGGAAAATAAAA  
CAAAAGTAGTACATATAATTGTGAGAAATTTGGAAAATAAAA  
TTGTGAGAAATTTGGAAAATAAAA  
GAAATTTGGAAAATAAAA  
GAAATTTGGAAAATAAAA

CCAACTACAGCTC  
CCAACTACAGCTCTCATTTGGACAGGGTGG  
CCAACTACAGCTCTCATTTGGACAGGGTGGCCTCTCAGGAGAAAGCTCAT  
CCAACTACAGCTCTCATTTGGACAGGG  
CCAACTACAGCTCTCATTTGGACAGGGTGGCCTCTCAGG
