# Supplementary material for: Identification and Characterization of Novel Fusion Genes with Potential Clinical Applications in Mexican Children with Acute Lymphoblastic Leukemia
Source: MDPI journal article supplement (doi:10.3390/ijms20102394), 2019-05-15
Supplement: s1 [file s1]

DNAH14-IKZF1 fusion gene

| DNAH14225333860                                                  | IKZF150444490                                                     |
|------------------------------------------------------------------|-------------------------------------------------------------------|
| AAACCACTAGTGGGGCCTATGAGGGCTCCACATGAGTGAGGCCAAAAAGC               | CAGTGTGGCTTCTTTTGTGAACCATGAGCACATTGGGCCCGATGCAAATG                |
| AGCCTCCTTCCTGGAACCACTAGTGGGGCCTATGAGGGCTCCACATGAGTGAGGCCAAAAAGCC |                                                                   |
| TGCCTCCTTCCTGGAACCACTAGTGGGGCCTATGAGGGCTCCACATGAGTGAGGCCAAAAAGC  | CAGTGTGGCT                                                        |
| TGCCTCCTTCCTGGAACCACTAGTGGGGCCTATGAGGGCTCCACATGAGTGAGGCCAAAAAGC  | CAGTGTGGC                                                         |
| TGCCTCCTTCCTGGAACCACTAGTGGGGCCTATGAGGGCTCCACATGAGTGAGGCCAAAAAGC  | CAGTGTGGCT                                                        |
| TCCTTCCTGGAACCACTAGTGGGGCCTATGAGGGCTCCACATGAGTGAGGCCAAAAAGC      | CAGTGTGGCTTCTT                                                    |
| TCCTGGAACCACTAGTGGGGCCTATGAGGGCTCCACATGAGTG                      |                                                                   |
| CCCTAGGGGGCCTATGAGGGCTCCACATGAGTGAGGCCAAAAAG                     |                                                                   |
| ACATGAGTGAGGCCAAAAAGC                                            | CAGTGTGGCTTCTTTTGTGAACCATGAGCACATTGGGCCCGATGCAAATGATC             |
| GCCTTAC                                                          | CAGTGTGGCTTCTTTTGTGAACCATGAGCACATTGGGCCCGATGCAAATGATCCACAGATATCAC |

| DNAH14225333863                                         | IKZF150367352                                                    |
|---------------------------------------------------------|------------------------------------------------------------------|
| CCACTAGTGGGGCCTATGAGGGCTCCACATGAGTGAGGCCAAAAAGCCTG      | CCACGACTCTGTCACTCTTGGAGCTTTGCTGTCTCTCCCGAGGTGGTGGAG              |
| GGAAACCACTAGTGGGGCCTATGAGGGCTCCACATGAGTGAGGCCAAAAAGCCTG | CCACG                                                            |
| GGAAACCACTAGTGGGGCCTATGAGGGCTCCACATGAGTGAGGCCAAAAAGCCTG | CTAATTAA                                                         |
| GGAAACCACTAGTGGGGCCTATGAGGGCTCCACATGAGTGAGGCCAAAAAGCCTG | CCACGACTCTG                                                      |
| GGAAACCACTAGTGGGGCCTATGAGGGCTCCACATGAGTGAGGCCAAAAAGCCTG | CCACGACTCTGT                                                     |
| GGAAACCACTAGTGGGGCCTATGAGGGCTCCACATGAGTG                |                                                                  |
| CCACTAGTGGGGCCTATGAGGGCTCCACATGAGTGAGGCCAAAAAGCCTG      | CCACG                                                            |
| CCCTAGGGGGCCTATGAGGGCTCCACATGAGTGAGGCCAAAAAG            |                                                                  |
| GGCCTATGAGGGCTCCACATGAGTGAGGCCAAAAAGCCTG                | CCACGACTCTGTCACTCTTGGAGCTTTGCTGTCC                               |
| ATGAGGGCTCCACATGAGTGAGGCCAAAAAGCCTG                     | CCACGACTCTGTCACTCTTGG                                            |
|                                                         | CCACTTACCCACGACTCTGTCACTCTTGGAGCTTTGCTGTCTCTCCCGAGGTGGTGGAGAGGTC |
|                                                         | CTTACCCACGACTCTGTCACTCTTGGAGCTTTGCTGTCTCTCCCGAGGTGGTGGAGAGGTC    |

| DNAH14225333863                                         | IKZF150444490                                        |
|---------------------------------------------------------|------------------------------------------------------|
| CCACTAGTGGGGCCTATGAGGGCTCCACATGAGTGAGGCCAAAAAGCCTG      | CAGTGTGGCTTCTTTTGTGAACCATGAGCACATTGGGCCCGATGCAAATG   |
| GGAAACCACTAGTGGGGCCTATGAGGGCTCCACATGAGTGAGGCCAAAAAGCCTG | CTAATTAA                                             |
| GGAAACCACTAGTGGGGCCTATGAGGGCTCCACATGAGTGAGGCCAAAAAGCCTG | CAGTGTGGCTT                                          |
| GGAAACCACTAGTGGGGCCTATGAGGGCTCCACATGAGTGAGGCCAAAAAGCCTG | CAGTGTGGCTT                                          |
| GGAAACCACTAGTGGGGCCTATGAGGGCTCCACATGAGTGAGGCCAAAAAGCCTG | CAGTGTGGCT                                           |
| GGAAACCACTAGTGGGGCCTATGAGGGCTCCACATGAGTGAGGCCAAAAAGCCTG | CAGTGTGGCT                                           |
| GGAAACCACTAGTGGGGCCTATGAGGGCTCCACATGAGTG                |                                                      |
| GGAAACCACTAGTGGGGCCTATGAGGGCTCCACATGAGTGAGGCCAAAAAGCCTG | CAGTGTGGCTTCTTTTGT                                   |
| GGAAACCACTAGTGGGGCCTATGAGGGCTCCACATGAGTGAGGCCAAAAAGCCTG | CAGTGTGGCTTCTGTTTGT                                  |
| CCCTAGGGGGCCTATGAGGGCTCCACATGAGTGAGGCCAAAAAG            |                                                      |
| ACTAGTGGGGCCTATGAGGGCTCCACATGAGTGAGGCCAAAAAGCCTG        | CAGTGTGGCTTCTTTTGTGAACCATG                           |
| AGTGGGGCCTATGAGGGCTCCACATGAGTGAGGCCAAAAAGCCTG           | CAGTGTGGCTTCTTTTGTGAACCATGAGC                        |
| AGTGGGGCCTATGAGGGCTCCACATGAGTGAGGCCAAAAAGCCTG           | CAGTGTGGCTTCTTTTGTGAACCATGAGC                        |
| GTGGGGCCTATGAGGGCTCCACATGAGTGAGGCCAAAAAGCCTG            | CAGTGTGGCTTCTTTTGTGAACCATGAGCA                       |
| GGGGCCTATGAGGGCTCCACATGAGTGAGGCCAAAAAGCCTG              | CAGTGTGGCTTCTTTTGTGAACCATGAGCA                       |
| GGCCTATGAGGGCTCCACATGAGTGAGGCCAAAAAGCCTG                | CAGTGTGGCTTCTTTTGTGAACCATGAGCACAT                    |
| ATGAGGGCTCCACATGAGTGAGGCCAAAAAGCCTG                     | CAGTGTGGCTTCTTTTGTGAACCATGAGCACATTGGG                |
| TCCACATGAGTGAGGCCAAAAAGCCTG                             | CAGTGTGGCTTCTTTTGTGAACCATGAGCACATTGGGCCCGATGC        |
| AGTGAGGCCAAAAAGCCTG                                     | CAGTGTGGCTTCTTTTGTGAACCATGAGCACATTGGGCCCGATGCAAATGAT |
| AAAAGCCTG                                               | CAGTGTGGCTTCTTTTGTGAACCATGAGCACATTGGGCCCGATGCAAATGAT |
| GCCTTAC                                                 | CAGTGTGGCTTCTTTTGTGAACCATGAGCACATTGGGCCCGATGCAAATGAT |
|                                                         | CAGTGTGGCTTCTTTTGTGAACCATGAGCACATTGGGCCCGATGCAAATGAT |

| DNAH14225346497                                            | IKZF150444230                                            |
|------------------------------------------------------------|----------------------------------------------------------|
| TACATGACTGATGCTGGCACTGGAAGTCTCACTGCCTCTGCTATTTCTG          | CCAGTAATGTTAAAGTAGAGACTCAGAGTGATGAAGAGAATGGGCGTGCC       |
| ATACCAATACATGACTGATGCTGGCACTGGAAGTCTCACTGCCTCTGCTATTTCTGGT |                                                          |
| ATACCAATACATGACTGATGCTGGCACTGGAAGTCT                       |                                                          |
| GGAAGTCTCACTGCCTCTGCTATTTCTG                               | CCAGTAATGTTAAAGTAGAGACTCAGAGTGATGAAGAGAATGGG             |
| TTCAG                                                      | CCAGTAATGTTAAAGTAGAGACTCAGAGTGATGGAGAGAATGGGCGTGCTGTGAAT |
|                                                            | CCAGTAATGTTAAAGTAGAGACTCAGAGTGATGAAGAGAATGGGCGTGCTGTGAAT |

| DNAH14225347499                                          | IKZF150367352                                                |
|----------------------------------------------------------|--------------------------------------------------------------|
| CTTTTGAAATGAGGATAATAGTGTCTGTTCTTCCCACCTTTGAAAGGGTG       | CCACGACTCTGTCACTCTTGGAGCTTTGCTGTCTCTCCCGAGGTGGTGGAG          |
| TTTCATCTTTTGAAATGAGGATAATAGTGTCTGTTCTTCCCACCTTTGAAAGGGTG | CCACGACT                                                     |
| ATGAGGATAATAGTGTCTGTTCTTCCCACCTTTGAAAG                   |                                                              |
| CTGTTCTTCCCACCTTTGAAAGGGTG                               | CCACGACTCTGTCACTCTTGGAGCTTTGCTGTCTCTCCCGAGGTGGTGG            |
| CTGTTCTTCCCACCTTTGAAAGGGTG                               | CCACGACTCTGTCACTCTTGGAGCTTTGCTGTCTCTCCCGAGGTGGTGG            |
| TCTTCCCACCTTTGAAAGGGTG                                   | CCACGACTCTGTCACTCTTGGAGCTTTGCTGTCTCTCCCGAGGTGGTGG            |
| TCTTCCCACCTTTGAAAGGGTG                                   | CCACGACTCTGTCACTCTTGGAGCTTTGCTGTCTCTCCCGAGGTGGTGG            |
| CCACTTAC                                                 | CCACGACTCTGTCACTCTTGGAGCTTTGCTGTCTCTCCCGAGGTGGTGGAGAGGTCCTCG |
