# Supplementary material for: Identification and Characterization of Novel Fusion Genes with Potential Clinical Applications in Mexican Children with Acute Lymphoblastic Leukemia
Source: MDPI journal article supplement (doi:10.3390/ijms20102394), 2019-05-15
Supplement: s1 [file s1]

| Supplementary materials Table 1. Overview of primer sequences for validation |                           |                             |
|------------------------------------------------------------------------------|---------------------------|-----------------------------|
| Primers (5'-3')                                                              | Sequence                  | Product size in silico (bp) |
| ETV6(NUFIP1)_F_int                                                           | TCCTGATCTCTCTCGCTGTG      | 118                         |
| NUFIP1_R_int                                                                 | TGCTCCTCTCTTCTCCTTTTCA    |                             |
| ETV6(NUFIP1)_F_ext                                                           | GGGAGAGATGCTGGAAGAAA      | 269                         |
| NUFIP1_R_ext                                                                 | ATGTCTGGACATCCCCTTCA      |                             |
| ETV6(SNUPN)_F_int                                                            | GCTCAGGATGGAGGAAGACTC     | 112                         |
| SNUPN_R_int                                                                  | GATCTTGAGACACAGAAAAGCTACT |                             |
| ETV6(SNUPN)_F_ext                                                            | TCCTGATCTCTCTCGCTGTG      | 339                         |
| SNUPN_R_ext                                                                  | GCTCACTCTGCTCCAAGGAA      |                             |
| DNAH14_F                                                                     | GCAGGGTGCCAAAACACTTT      | 306                         |
| IKZF1_R                                                                      | CACGGAAGGGGGTCTTTCC       |                             |
| SRGAP2B_F_int                                                                | TCGGAAGAAGTCCTGGAGGT      | 201                         |
| CREBBP_R_int                                                                 | TGTTTTCGCGAGCAGGTGAA      |                             |
| ZNF384_F_ext                                                                 | GGCAACAGCTGATCCTTCAT      | 106                         |
| EP300_R_ext                                                                  | AGAGCCTATGCAGCTCTTGG      |                             |
| ZNF384_F_int                                                                 | GGGGATAGAAGGCCAGAAGT      | 250                         |
| EP300_R_int                                                                  | ATCAGCAGCCTGGGCAGT        |                             |
| SUDS3P1_F_ext                                                                | GCAATCAGGTTCTCTTTCAGC     | 218                         |
| SUDS3_R_ext                                                                  | TGCAACAACCTGCAAGAAGGT     |                             |
| SUDS3P1_F_int                                                                | GCTGGAGGAAGAGTTTCTGC      | 117                         |
| SUDS3_R_int                                                                  | ACGGAATGCAGAGGGGAATA      |                             |
| WDR74_F_int                                                                  | GGAGATGGAATAGGAGCTTGC     | 101                         |
| RCC1_R_int                                                                   | CTATGCTCCCCCTACGCCACT     |                             |
| WDR74_F_ext                                                                  | GAGGCGACCGAAGTAAAGGT      | 271                         |
| RCC1_R_ext                                                                   | ACGTTGTGGAAAGGGACTTG      |                             |
| GLYR1_F_int                                                                  | GAGGAAGAGCCAGTCTGTCCG     | 105                         |
| SLC9A8_R_int                                                                 | CCTTGGA CTATGTTTACAATCAGC |                             |
| GLYR1_F_ext                                                                  | GGCCACATCTCCTCTGTTTC      | 264                         |
| SLC9A8_R_ext                                                                 | AGGGTCAGCACCTCAGTGAT      |                             |
